# Supplementary material for: MUC1 induces drug resistance in pancreatic cancer cells via upregulation of multidrug resistance genes
Source: Springer Nature journal article supplement (doi:10.1038/oncsis.2013.16), 2013-06-17
Supplement: 41389_2013_BFoncsis201316_MOESM228_ESM.pdf [file 41389_2013_BFoncsis201316_MOESM228_ESM.pdf]

**Supplemental Table 1. Densitometric analysis of MUC1 and  $\beta$ -actin levels in MUC1 siRNA treated Capan-1 cell line using Image J software (Figure 1C).**

| Samples                      | MUC1 |       |               | $\beta$ -actin |        |               |
|------------------------------|------|-------|---------------|----------------|--------|---------------|
|                              | Area | Mean  | Adjusted mean | Area           | Mean   | Adjusted mean |
| Capan-1 WT                   | 0.08 | 35.09 | 35.09         | 0.03           | 119.16 | 1.00          |
| Capan-1 Ctrl siRNA           | 0.08 | 40.10 | 46.26         | 0.03           | 103.31 | 1.15          |
| Capan-1 MUC1 siRNA           | 0.08 | 3.63  | 3.66          | 0.03           | 118.16 | 1.01          |
| % expression after knockdown |      |       | 10.43         |                |        |               |

**Supplemental Table 2. Densitometric analysis of MUC1 and  $\beta$ -actin levels in KCKO and KCM cell lines using Image J software (Figure 2A).**

| Samples | MUC1 |        |               | $\beta$ -actin |        |               |
|---------|------|--------|---------------|----------------|--------|---------------|
|         | Area | Mean   | Adjusted mean | Area           | Mean   | Adjusted mean |
| KCKO    | 0.11 | 15.36  | 19.40         | 0.02           | 98.10  | 1.26          |
| KCM     | 0.11 | 141.88 | 141.88        | 0.02           | 123.94 | 1.00          |

**Supplemental Table 3. Densitometric analysis of MUC1 and  $\beta$ -actin levels in BxPC3 Neo and BxPC3 MUC1 cell lines using Image J software (Figure 3A).**

| Samples    | MUC1 |       |               | $\beta$ -actin |        |               |
|------------|------|-------|---------------|----------------|--------|---------------|
|            | Area | Mean  | Adjusted mean | Area           | Mean   | Adjusted mean |
| BxPC3 Neo  | 0.11 | 0.00  | 0.00          | 0.04           | 119.80 | 1.1           |
| BxPC3 MUC1 | 0.11 | 97.01 | 97.01         | 0.04           | 129.61 | 1.0           |

**Supplemental Table 4. Densitometric analysis of MRP1 and  $\beta$ -actin levels in BxPC3 Neo and BxPC3 MUC1 tumor lysate using Image J software (Figure 4B).**

| Samples    | MRP1 |        |               | $\beta$ -actin |        |               |
|------------|------|--------|---------------|----------------|--------|---------------|
|            | Area | Mean   | Adjusted mean | Area           | Mean   | Adjusted mean |
| KCKO       | 0.08 | 42.01  | 42.01         | 0.06           | 110.39 | 1.00          |
| KCM        | 0.08 | 124.33 | 125.39        | 0.06           | 109.46 | 1.01          |
| BxPC3 Neo  | 0.09 | 54.00  | 58.96         | 0.06           | 96.57  | 1.09          |
| BxPC3 MUC1 | 0.09 | 144.24 | 144.24        | 0.06           | 105.44 | 1.00          |

**Supplemental Table 5. Densitometric analysis of MUC1 expression in BxPC3 Neo and BxPC3 MUC1 tumor lysate using Image J software (Figure 4D).**

| Samples              | MUC1  |         |               | MRP1  |        |               | β-actin |         |               |
|----------------------|-------|---------|---------------|-------|--------|---------------|---------|---------|---------------|
|                      | Area  | Mean    | Adjusted mean | Area  | Mean   | Adjusted mean | Area    | Mean    | Adjusted mean |
| BxPC3 Neo sample #1  | 0.224 | 62.521  | 76.3          | 0.061 | 80.358 | 98.07         | 0.061   | 127.075 | 1.22          |
| BxPC3 Neo sample #2  | 0.224 | 70.731  | 73.2          | 0.061 | 81.448 | 84.26         | 0.061   | 149.909 | 1.03          |
| BxPC3 MUC1 sample #3 | 0.224 | 162.151 | 165.1         | 0.061 | 131.45 | 133.80        | 0.061   | 152.352 | 1.02          |
| BxPC3 MUC1 sample #4 | 0.224 | 141.456 | 141.5         | 0.061 | 99.342 | 99.34         | 0.061   | 155.077 | 1.00          |

**Supplemental Table 6. Densitometric analysis of phospho Akt and total Akt levels in cell lines using image J software (Figure 5A).**

| Samples    | phospho-Akt |        |               | Akt  |        |               | β-actin |        |               | phospho Akt/total Akt | MUC1+ve/MUC1 -ve |
|------------|-------------|--------|---------------|------|--------|---------------|---------|--------|---------------|-----------------------|------------------|
|            | Area        | Mean   | Adjusted mean | Area | Mean   | Adjusted mean | Area    | Mean   | Adjusted mean |                       |                  |
| KCKO       | 0.03        | 66.78  | 70.22         | 0.04 | 117.93 | 124.00        | 0.03    | 158.26 | 1.05          | 0.57                  |                  |
| KCM        | 0.03        | 120.48 | 120.48        | 0.04 | 113.24 | 113.24        | 0.03    | 166.41 | 1.00          | 1.06                  | 1.88             |
| BxPC3 Neo  | 0.04        | 72.50  | 77.32         | 0.04 | 145.17 | 154.83        | 0.03    | 141.58 | 1.07          | 0.50                  |                  |
| BxPC3 MUC1 | 0.04        | 154.03 | 156.82        | 0.04 | 164.28 | 167.26        | 0.03    | 148.31 | 1.02          | 0.94                  | 1.88             |

**Supplemental Table 7. Densitometric analysis of total Akt, MRP1, MUC1 and β-actin levels in Akt siRNA treated Capan-1 cells using image J software (Figure 5 B).**

| Samples                      | Akt  |        |               | MRP1 |        |               | MUC1 |       |               | β-actin |        |               |
|------------------------------|------|--------|---------------|------|--------|---------------|------|-------|---------------|---------|--------|---------------|
|                              | Area | Mean   | Adjusted mean | Area | Mean   | Adjusted mean | Area | Mean  | Adjusted mean | Area    | Mean   | Adjusted mean |
| Capan-1 WT                   | 0.02 | 131.38 | 131.37        | 0.03 | 194.81 | 194.81        | 0.01 | 75.71 | 75.71         | 0.01    | 161.14 | 1.00          |
| Capan-1 Ctrl siRNA           | 0.02 | 133.57 | 139.52        | 0.03 | 100.44 | 104.91        | 0.01 | 65.00 | 67.89         | 0.01    | 154.27 | 1.04          |
| Capan-1 Akt siRNA            | 0.02 | 94.27  | 80.12         | 0.03 | 35.64  | 35.87         | 0.01 | 23.36 | 23.51         | 0.01    | 160.10 | 1.01          |
| % expression after knockdown |      |        | 60.99         |      |        |               |      |       |               |         |        |               |
| Fold change                  |      |        |               |      |        | 5.43          |      |       | 3.22          |         |        |               |

**Supplemental Table 8. Densitometric analysis of total Akt, MRP1, MUC1 and β-actin levels in Akt siRNA treated BxPC3 cells using image J (Figure 5 C).**

| Samples               | Akt   |       |               | MRP1 |         |               | MUC1  |         |               | β-actin |        |               |
|-----------------------|-------|-------|---------------|------|---------|---------------|-------|---------|---------------|---------|--------|---------------|
|                       | Area  | Mean  | Adjusted mean | Area | Mean    | Adjusted mean | Area  | Mean    | Adjusted mean | Area    | Mean   | Adjusted mean |
| BxPC3 Neo WT          | 0.052 | 149.0 | 166.4         | 0.05 | 83.943  | 93.7          | 0.083 | 4.998   | 5.6           | 0.061   | 90.157 | 1.1           |
| BxPC3 MUC1 WT         | 0.052 | 125.6 | 176.5         | 0.05 | 137.408 | 193.1         | 0.083 | 124.328 | 174.7         | 0.061   | 71.64  | 1.4           |
| BxPC3 MUC1 Ctrl siRNA | 0.052 | 114.2 | 139.9         | 0.05 | 112.779 | 138.2         | 0.083 | 87.616  | 107.4         | 0.061   | 82.154 | 1.2           |

|                              |       |      |       |      |        |      |       |        |      |       |         |     |
|------------------------------|-------|------|-------|------|--------|------|-------|--------|------|-------|---------|-----|
| BxPC3 MUC1 Akt siRNA         | 0.052 | 86.5 | 86.5  | 0.05 | 41.376 | 41.4 | 0.083 | 71.432 | 71.4 | 0.061 | 100.667 | 1.0 |
| % expression after kncokdown |       |      | 49.02 |      |        |      |       |        |      |       |         |     |
| Fold change                  |       |      |       |      |        | 4.67 |       |        | 2.45 |       |         |     |

**Supplemental Table 9. Densitometric analysis of total Akt, MRP1, MUC1 and  $\beta$ -actin levels in KCKO cells and Akt siRNA treated KCM cells using image J (Figure 5D).**

| Samples                      | Akt   |      |               | MRP1 |      |               | MUC1  |       |               | $\beta$ -actin |       |               |
|------------------------------|-------|------|---------------|------|------|---------------|-------|-------|---------------|----------------|-------|---------------|
|                              | Area  | Mean | Adjusted mean | Area | Mean | Adjusted mean | Area  | Mean  | Adjusted mean | Area           | Mean  | Adjusted mean |
| KCKO WT                      | 0.049 | 93.9 | 117.3         | 0.06 | 56.9 | 71.0          | 0.066 | 0     | 0             | 0.052          | 82.5  | 1.25          |
| KCM WT                       | 0.049 | 79.2 | 81.4          | 0.06 | 93.6 | 96.3          | 0.066 | 132.1 | 135.8         | 0.052          | 100.3 | 1.03          |
| KCM Ctrl siRNA               | 0.049 | 80.2 | 89.0          | 0.06 | 84.8 | 94.1          | 0.066 | 135.6 | 150.5         | 0.052          | 92.9  | 1.11          |
| KCM Akt siRNA                | 0.049 | 22.9 | 22.9          | 0.06 | 81.6 | 81.6          | 0.066 | 115.9 | 115.9         | 0.052          | 103.1 | 1.00          |
| % expression after kncokdown |       |      | 28.16         |      |      |               |       |       |               |                |       |               |
| Fold change                  |       |      |               |      |      | 1.18          |       |       | 1.17          |                |       |               |

**Supplemental Table 10. Densitometric analysis of the PCR product following ChIP assay in Capan-1 cells (Figure 6C).**

| ChIP region I  | Area | Arbitrary units | Fold enrichment (CT2 DNA/ IgG DNA) |
|----------------|------|-----------------|------------------------------------|
| Capan-1 Input  | 5472 | 242             |                                    |
| Capan-1 IgG    | 5472 | 19              |                                    |
| Capan-1 CT2    | 5472 | 124             | 6.5                                |
| ChIP region II | Area | Arbitrary units | Fold enrichment (CT2 DNA/ IgG DNA) |
| Capan-1 Input  | 4300 | 240             |                                    |
| Capan-1 IgG    | 4300 | 46              |                                    |
| Capan-1 CT2    | 4300 | 16              | 0.3                                |

**Supplemental Table 11. Densitometric analysis of the PCR product following ChIP assay in KCKO and KCM cells (Figure 6C).**

| ChIP region I | Area | Arbitrary units | Fold enrichment (CT2 DNA/ IgG DNA) |
|---------------|------|-----------------|------------------------------------|
|---------------|------|-----------------|------------------------------------|

|                       |             |                        |                                           |
|-----------------------|-------------|------------------------|-------------------------------------------|
| KCKO Input            | 840         | 185                    |                                           |
| KCKO IgG              | 840         | 43                     |                                           |
| KCKO CT2              | 840         | 29                     | 0.7                                       |
| KCM Input             | 0.107       | 152                    |                                           |
| KCM IgG               | 0.107       | 40                     |                                           |
| KCM CT2               | 0.107       | 128                    | 3.2                                       |
| <b>ChIP region II</b> | <b>Area</b> | <b>Arbitrary units</b> | <b>Fold enrichment (CT2 DNA/ IgG DNA)</b> |
| KCKO Input            | 406         | 85                     |                                           |
| KCKO IgG              | 406         | 27                     |                                           |
| KCKO CT2              | 406         | 20                     | 0.7                                       |
| KCM Input             | 0.078       | 141                    |                                           |
| KCM IgG               | 0.078       | 35                     |                                           |
| KCM CT2               | 0.078       | 25                     | 0.7                                       |

Supplemental Table 12. Densitometric analysis of the PCR product following ChIP assay in BxPC3 Neo and BxPC3 MUC1 cells (Figure 6C).

|                       |             |                        |                                           |
|-----------------------|-------------|------------------------|-------------------------------------------|
| <b>ChIP region I</b>  | <b>Area</b> | <b>Arbitrary units</b> | <b>Fold enrichment (CT2 DNA/ IgG DNA)</b> |
| BxPC3 Input           | 0.031       | 123.33                 |                                           |
| BxPC3 IgG             | 0.031       | 96.05                  |                                           |
| BxPC3 CT2             | 0.031       | 108.44                 | 1.1                                       |
| BxPC3 Input           | 0.031       | 212.65                 |                                           |
| BxPC3 IgG             | 0.031       | 93.28                  |                                           |
| BxPC3 CT2             | 0.031       | 101.67                 | 1.1                                       |
| <b>ChIP region II</b> | <b>Area</b> | <b>Arbitrary units</b> | <b>Fold enrichment (Chip/Input DNA)</b>   |
| BxPC3 Input           | 0.031       | 95.11                  |                                           |
| BxPC3 IgG             | 0.031       | 83.85                  |                                           |
| BxPC3 CT2             | 0.031       | 85.30                  | 1.0                                       |
| BxPC3 Input           | 0.031       | 98.65                  |                                           |
| BxPC3 IgG             | 0.031       | 80.50                  |                                           |
| BxPC3 CT2             | 0.031       | 79.74                  | 1.0                                       |
